# Supplementary material for: Tmprss12 is required for sperm motility and uterotubal junction migration in mice
Source: PubMed Central journal article supplement (PMC7401031; doi:10.1093/biolre/ioaa060), 2020-04-25

# Figure S1

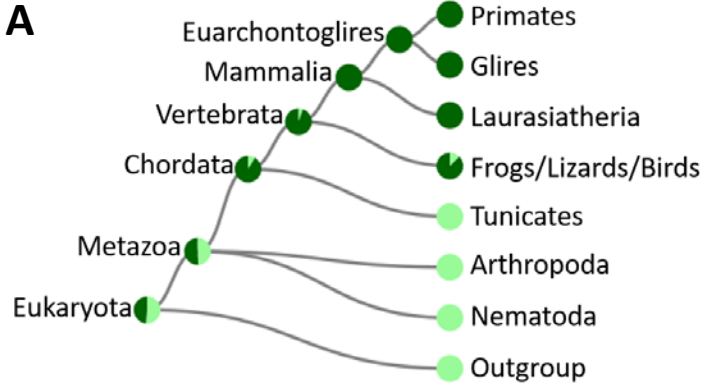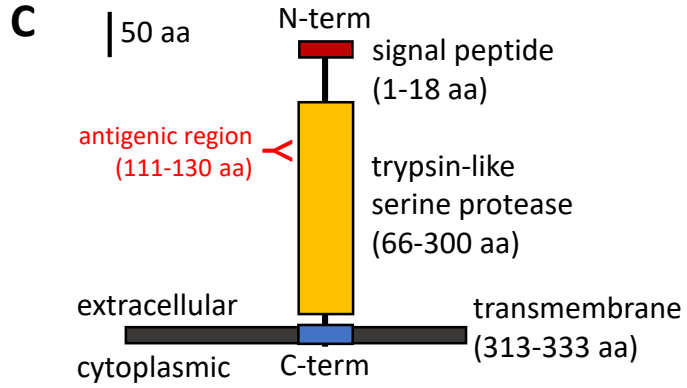

**B**

|              |     |                 |               |               |            |              |                |             |                 |             |     |
|--------------|-----|-----------------|---------------|---------------|------------|--------------|----------------|-------------|-----------------|-------------|-----|
| Homo sapiens | 1   | MRLGLLSVALLFVGS | SHLYSDHYS     | SPSGRRHRLGPS  | PEPAASSQQA | EA           | AVRKRLRRRREGGA | HAEDCGTAPLK | 70              |             |     |
| Mus musculus | 1   | MASWALSAALLCLG  | GAFAYSELHSLSL | REGSALGOATV   | PGPPEE     | EQPVT        | -----          | DCGIAPLR    | 58              |             |     |
| Homo sapiens | 71  | DVLQGSRIIGGTEA  | QAGAWPVVSLQ   | IKYGRVLMHVCG  | GTLVRE     | RWVLTAAHCTK  | DASDPLMNTAV    | IGTN        | 140             |             |     |
| Mus musculus | 59  | GAVEGSRRIIGGS   | QADTGAWPQV    | SLQVQDGDILM   | HVCGGALVR  | DRWVLTAAHCT  | KEARDPLKNRA    | VMGTN       | 128             |             |     |
| Homo sapiens | 141 | NI-HGRYPETKKIK  | KIKAIITIE     | ENFILESYVNDIA | LFLKKA     | AVRYNDYIQPIC | LPDVFQILDG     | NTKCFIS     | 209             |             |     |
| Mus musculus | 129 | DLTRSPY-HSRNIR  | ITDIIIE       | PEFIMETFVNDIA | LFLKRA     | VRYNDYIQPIC  | LPFGVFOKLD     | ONTACFIS    | 197             |             |     |
| Homo sapiens | 210 | GWGRTKEEGNATN   | ILQDAEVHYIS   | REMONSERSYGG  | IIPNTSFCAG | DEDEGAFDTC   | RGDSGGPLM      | CYLPEY      | 279             |             |     |
| Mus musculus | 198 | GWGRTREEGNGIT   | ILQEAQVHFI    | SREVCSSDQGYS  | GMIPNTSFC  | AGHENGTFD    | SCRGDSGGP      | LMCYLPEH    | 267             |             |     |
| Homo sapiens | 280 | KRF             | FVMGITSYGHG   | CGRRGFPGVY    | IGPSEYQK   | WLT          | EHFFHASTQ      | GLTINILRG   | QILIALCFVILLATT | 348         |     |
| Mus musculus | 268 | SRY             | FVMGITSYGHG   | CGRRHFP       | GVYSNPSE   | FEQ          | WMT            | HYLSQGNIN   | RLFNMDIVLGC     | VLTALGSVILL | 336 |

**Figure S2**

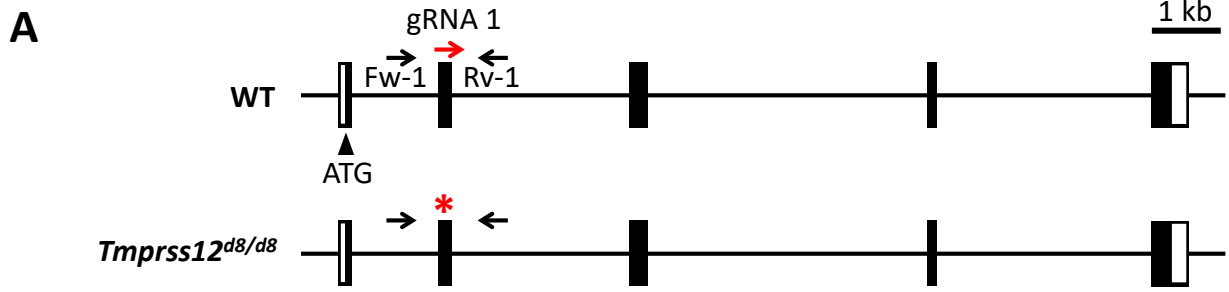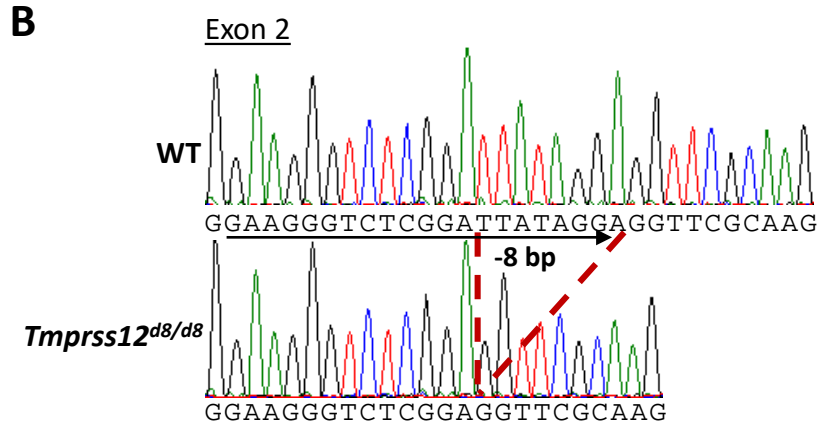

**C**

|                                 |         |                  |      |     |
|---------------------------------|---------|------------------|------|-----|
|                                 | 1       | 63               | 70   | 336 |
| WT                              | MASW--- | GSRIIGGS---      | LGVT |     |
| <i>Tmprss12<sup>d8/d8</sup></i> | MASW--- | GSR <b>RFAS*</b> |      |     |

**Figure S3**

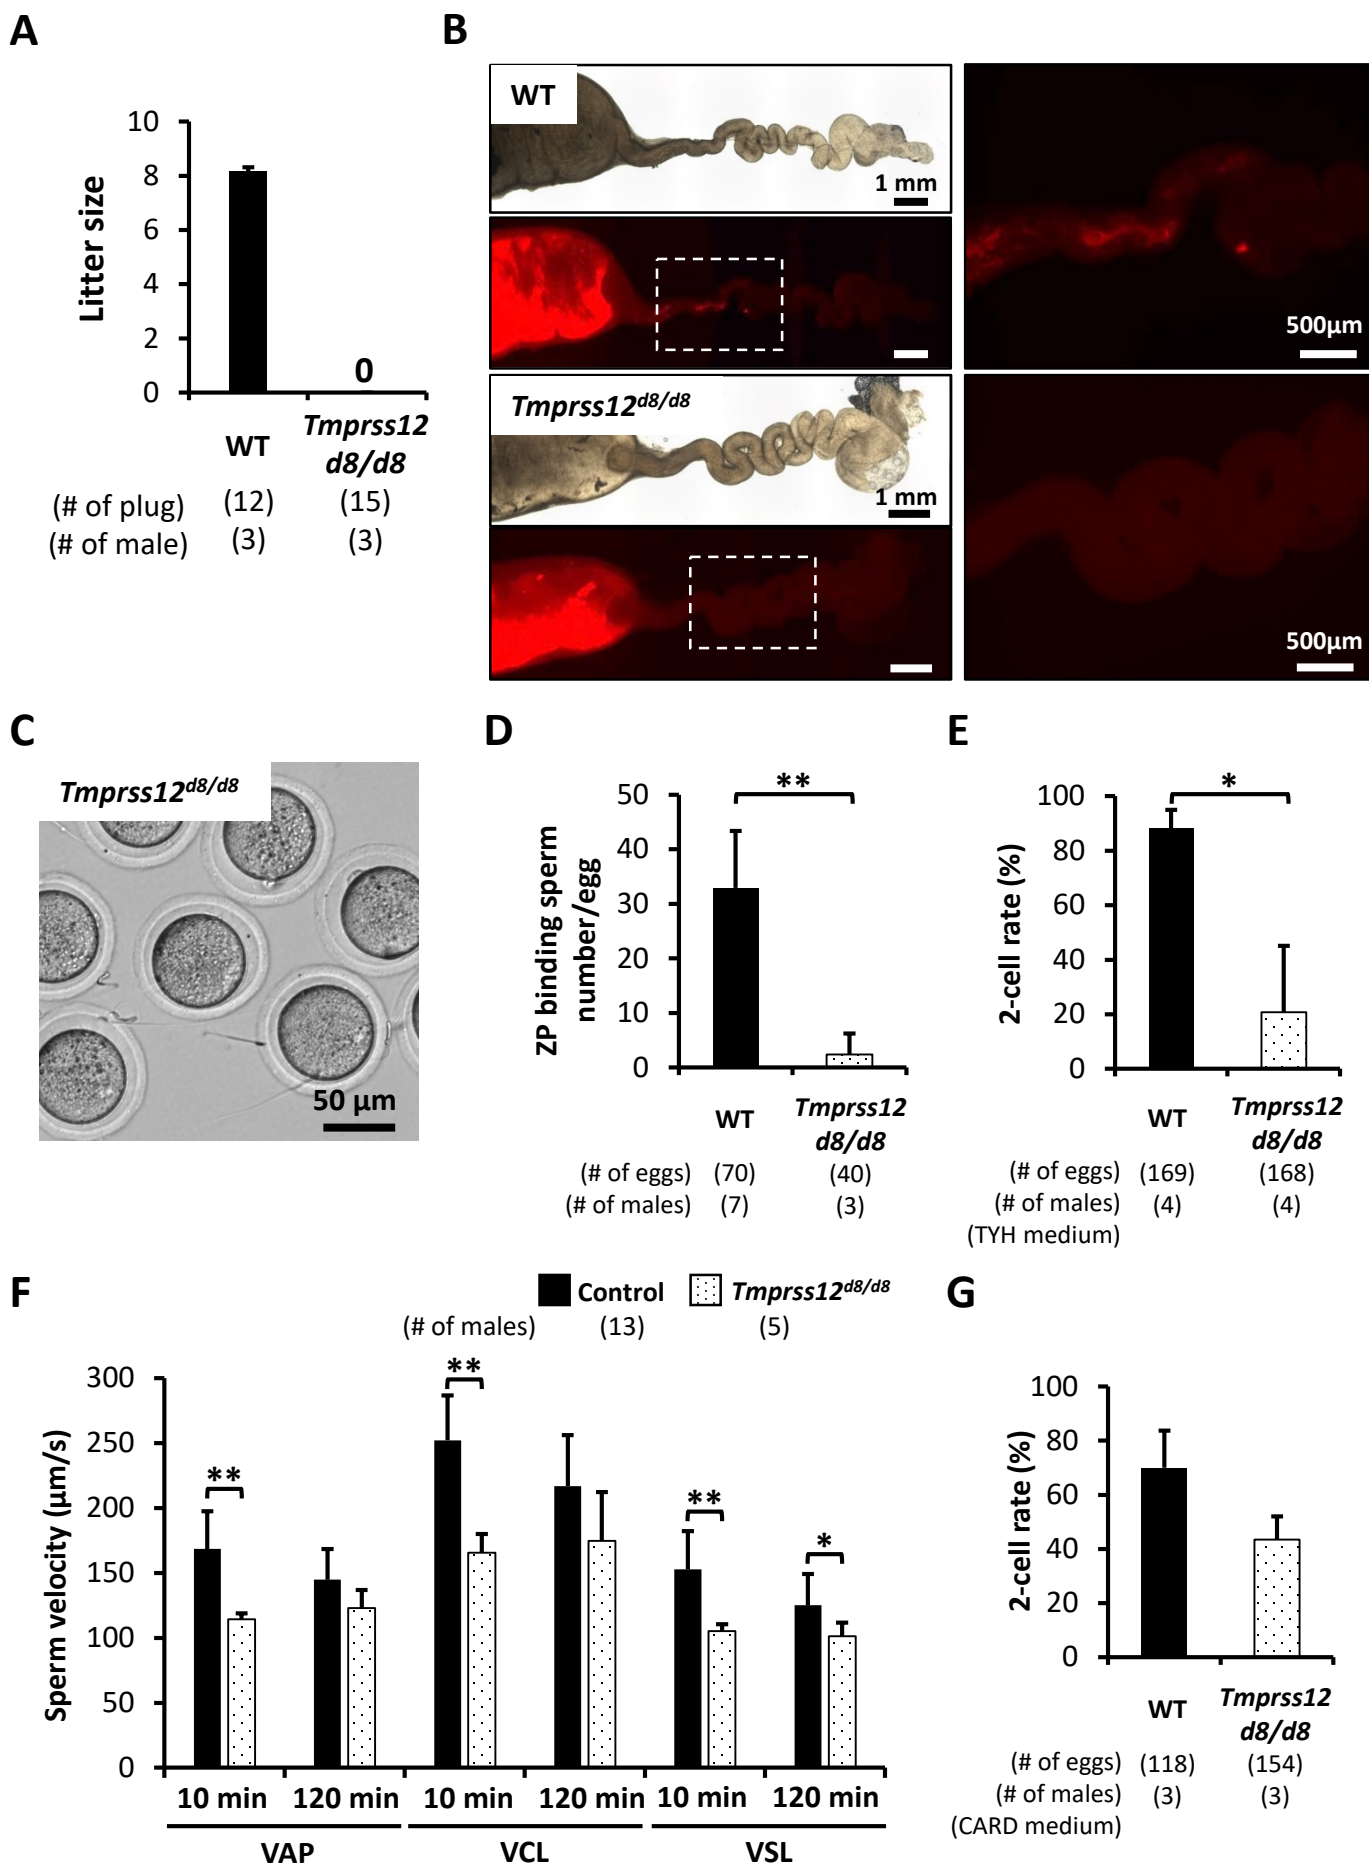

**Figure S4**

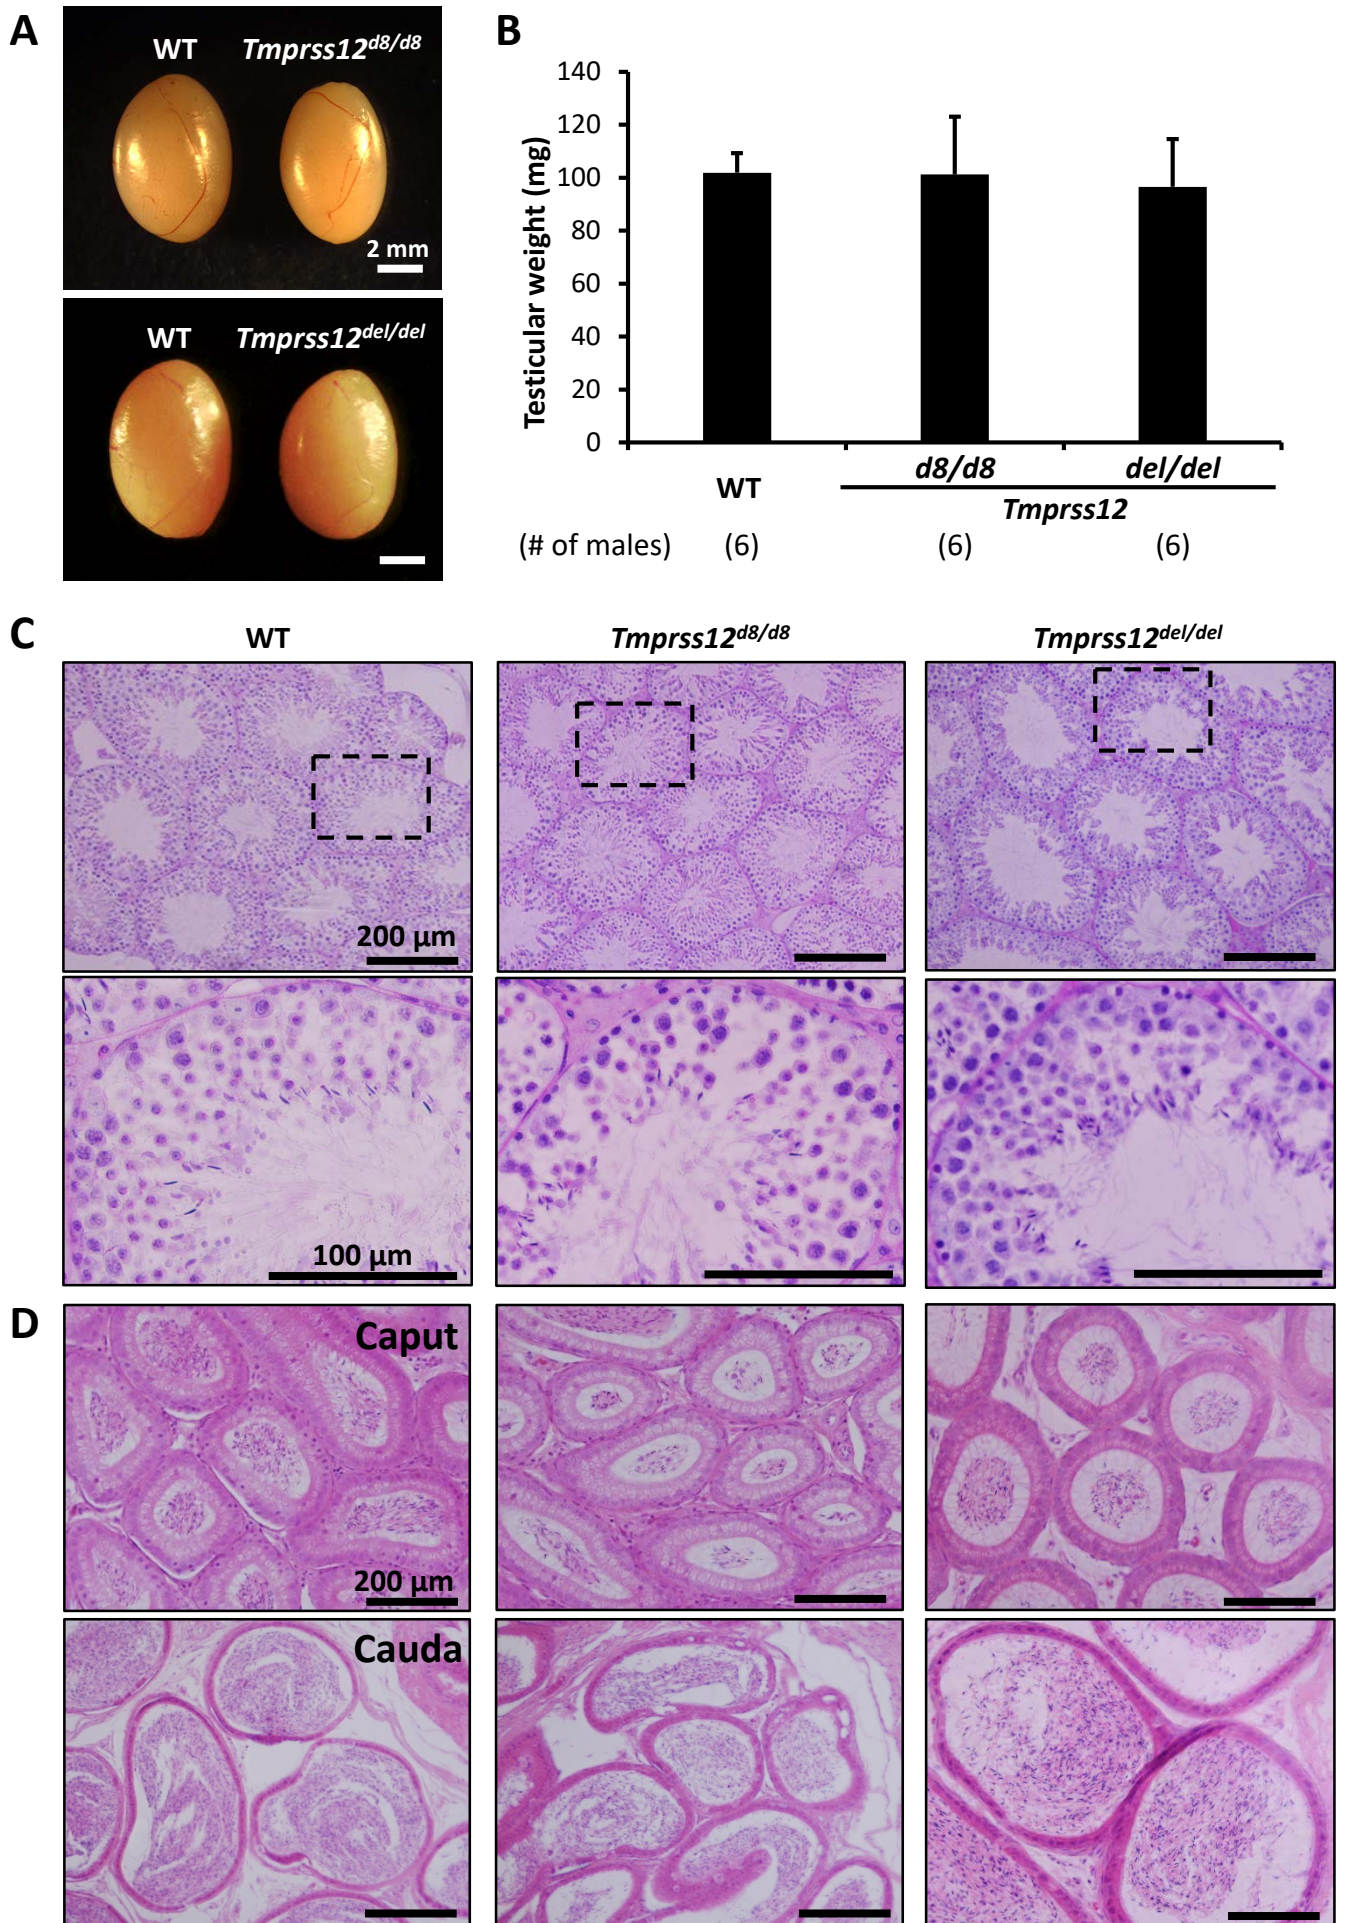

**Figure S5**

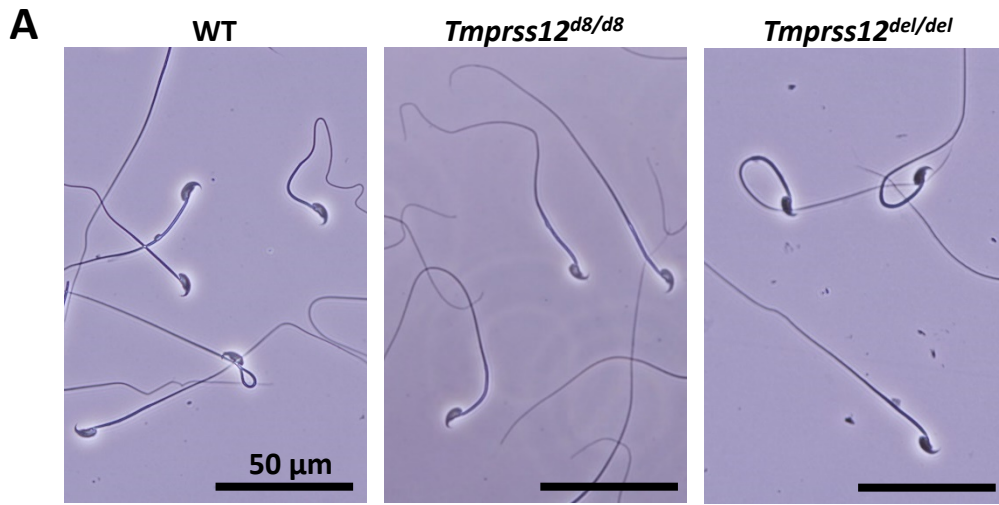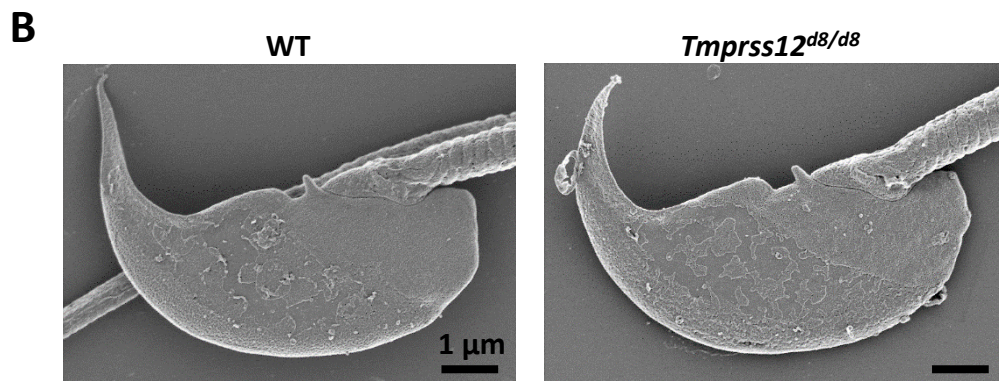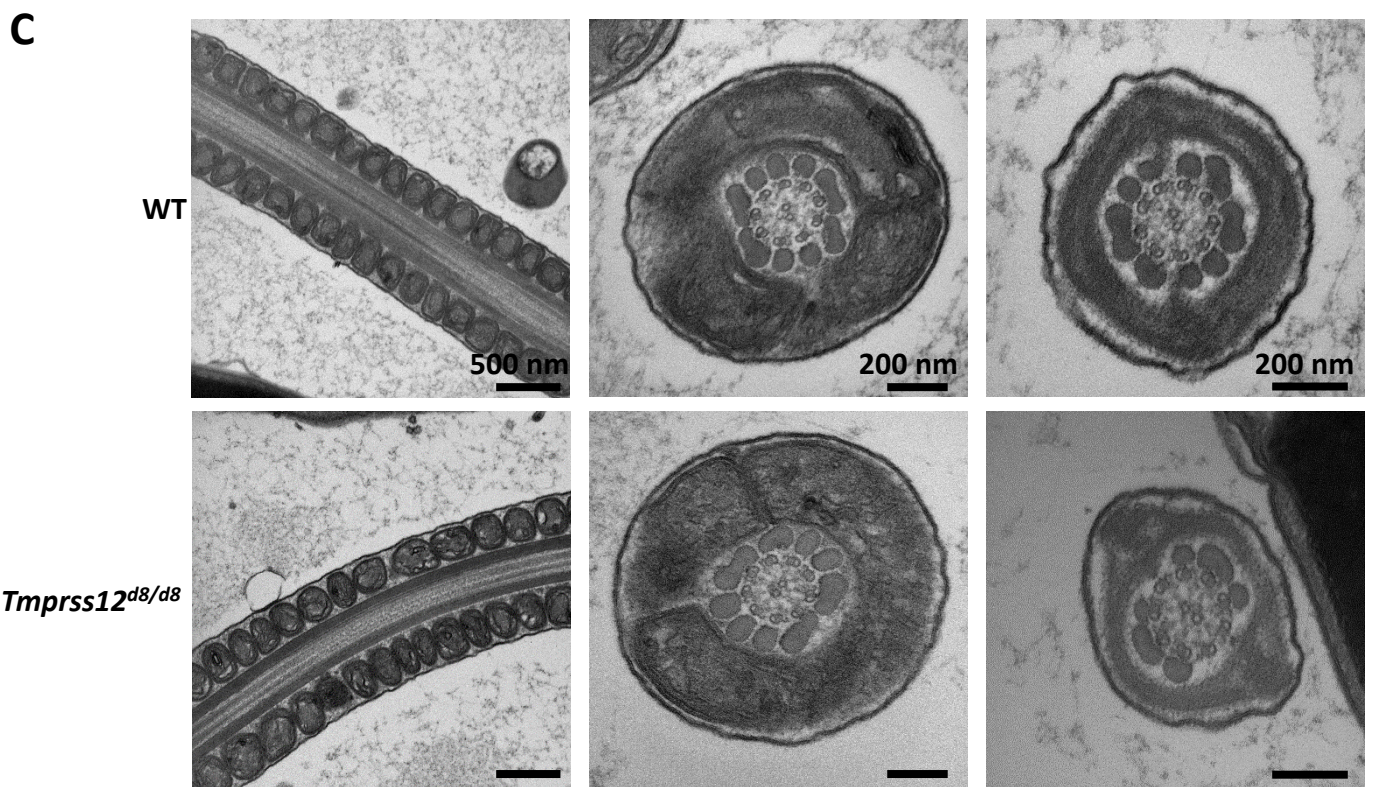

Supplement: supplementary_figures_ioaa060.pdf [file supplementary_figures_ioaa060.pdf]
